RESEARCH ARTICLE

# Change in Image Quality According to the 3D Locations of a CBCT Phantom

Jae Joon Hwang, Hyok Park, Ho-Gul Jeong, Sang-Sun Han\*

Department of Oral and Maxillofacial Radiology, College of Dentistry, Yonsei University, Seoul, Korea

\* [sshan@yuhs.ac](mailto:sshan@yuhs.ac)

## Abstract

A patient's position changes in every CBCT scan despite patient alignment protocols. However, there have been studies to determine image quality differences when an object is located at the center of the field of view (FOV). To evaluate changes in the image quality of the CBCT scan according to different object positions, the image quality indexes of the Alphard 3030 (Alphard Roentgen Ind., Ltd., Kyoto, Japan) and the Rayscan Symphony (RAY Ind., Ltd., Suwon, Korea) were measured using the Quart DVT\_AP phantom at the center of the FOV and 6 peripheral positions under four types of exposure conditions. Anterior, posterior, right, left, upper, and lower positions 1 cm offset from the center of the FOV were used for the peripheral positions. We evaluated and compared the voxel size, homogeneity, contrast to noise ratio (CNR), and the 10% point of the modulation transfer function (MTF10%) of the center and periphery. Because the voxel size, which is determined by the Nyquist frequency, was within tolerance, other image quality indexes were not influenced by the voxel size. For the CNR, homogeneity, and MTF10%, there were peripheral positions which showed considerable differences with statistical significance. The average difference between the center and periphery was up to 31.27% (CNR), 70.49% (homogeneity), and 13.64% (MTF10%). Homogeneity was under tolerance at some of the peripheral locations. Because the CNR, homogeneity, and MTF10% were significantly affected by positional changes of the phantom, an object's position can influence the interpretation of follow up CBCT images. Therefore, efforts to locate the object in the same position are important.

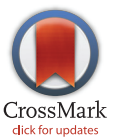

## OPEN ACCESS

**Citation:** Hwang JJ, Park H, Jeong H-G, Han S-S (2016) Change in Image Quality According to the 3D Locations of a CBCT Phantom. PLoS ONE 11(4): e0153884. doi:10.1371/journal.pone.0153884

**Editor:** Sompop Bencharit, University of North Carolina at Chapel Hill, UNITED STATES

**Received:** October 19, 2015

**Accepted:** April 5, 2016

**Published:** April 19, 2016

**Copyright:** © 2016 Hwang et al. This is an open access article distributed under the terms of the [Creative Commons Attribution License](https://creativecommons.org/licenses/by/4.0/), which permits unrestricted use, distribution, and reproduction in any medium, provided the original author and source are credited.

**Data Availability Statement:** All relevant data are within the paper and its Supporting Information files.

**Funding:** The authors received no specific funding for this work.

**Competing Interests:** The authors have declared that no competing interests exist.

## Introduction

CBCT has become the most widely used imaging modality for preoperative diagnosis, and postoperative evaluation of various fields in the dental area. CBCT has the advantage of having a higher resolution, lower dose, and cheaper price than the multi-slice computed tomography (MSCT). [1,2] Additionally, efforts to standardize the CBCT measurement of image quality have been made for the development of a CBCT phantom, including the SEDENTEXCT project [3] from Europe and the DIN 6868-161. [4] Yet, there has been no unified global standard for CBCT image quality assessment until now. Several papers have reported image quality differences according to different CBCT machines, field of views (FOVs), and exposure protocols.

[2,5–7] However, these studies only measured the image quality of the object positioned at the center of the FOV. Bamba et al.[8] reported that the noise level was different in the thin slices of two CBCT units when the phantom was located at one peripheral position; however, this study did not discern the effect of the object location 3-dimensionally. There have been no reports analyzing the change in image quality according to the 3D locations using the CBCT phantom until now. The purpose of this study is to evaluate the changes in the image quality according to the 3D phantom locations in the four exposure conditions using the Quart DVT\_AP phantom.

## Materials and Methods

### Measurements

CBCT data were collected using the Rayscan Symphony (RAY Ind., Ltd., Suwon, Korea) and three exposure protocols from the Alphard 3030 (Alphard Roentgen Ind., Ltd., Kyoto, Japan). The exposure protocols used for each CBCT unit are shown in Table 1. The QUART DVT\_AP (QUART GmbH, Zorneding, Germany) is made of polymethyl methacrylate (PMMA) containing all of the required test objects for quality control (Fig 1). The center of the FOV was used as a reference position according to the phantom manual. The center of the Quart DVT\_AP phantom was located in the upper, lower, right, left, anterior, and posterior positions 1 cm offset from the center of the FOV (Fig 2). All of the examinations were repeated five times independently. Because there is no ear holder and head rest in the Symphony, these

Table 1. Cone beam CT machines and exposure protocols.

| CBCT Device  | Mode         | FOV [diameter(mm) x height (mm)] | Scan mode | Voltage (kV) | Current (mA) | Exposure time (s) | Voxel size (mm) |
|--------------|--------------|----------------------------------|-----------|--------------|--------------|-------------------|-----------------|
| Alphard 3030 | Implant (I)  | 102 x 102                        | Full      | 80           | 8mA          | 17s               | 0.20            |
|              | Panorama (P) | 154 x 154                        | Full      | 80           | 5mA          | 17s               | 0.30            |
|              | Cephalo (C)  | 200 x 200                        | Full      | 80           | 5mA          | 17s               | 0.39            |
| Ray Symphony |              | 142 x 142                        | Full      | 90           | 10mA         | 13s               | 0.38            |

doi:10.1371/journal.pone.0153884.t001

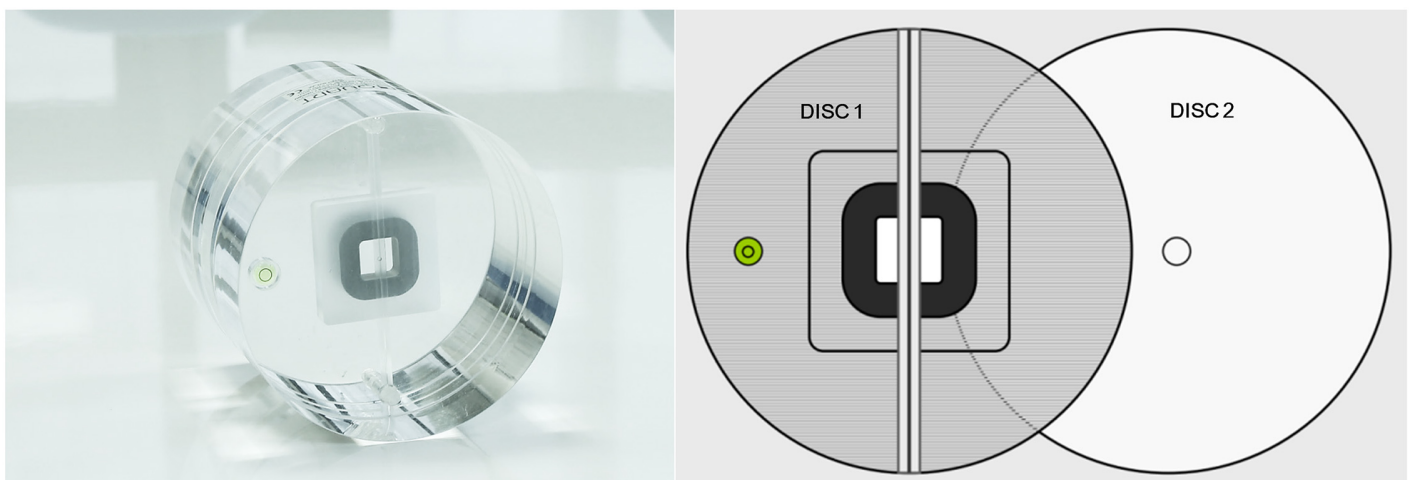

Fig 1. DVT\_AP phantom. (A) the DVT\_AP phantom. (B) disc 1 containing the test objects and disc 2 containing scatter radiation parts.

doi:10.1371/journal.pone.0153884.g001

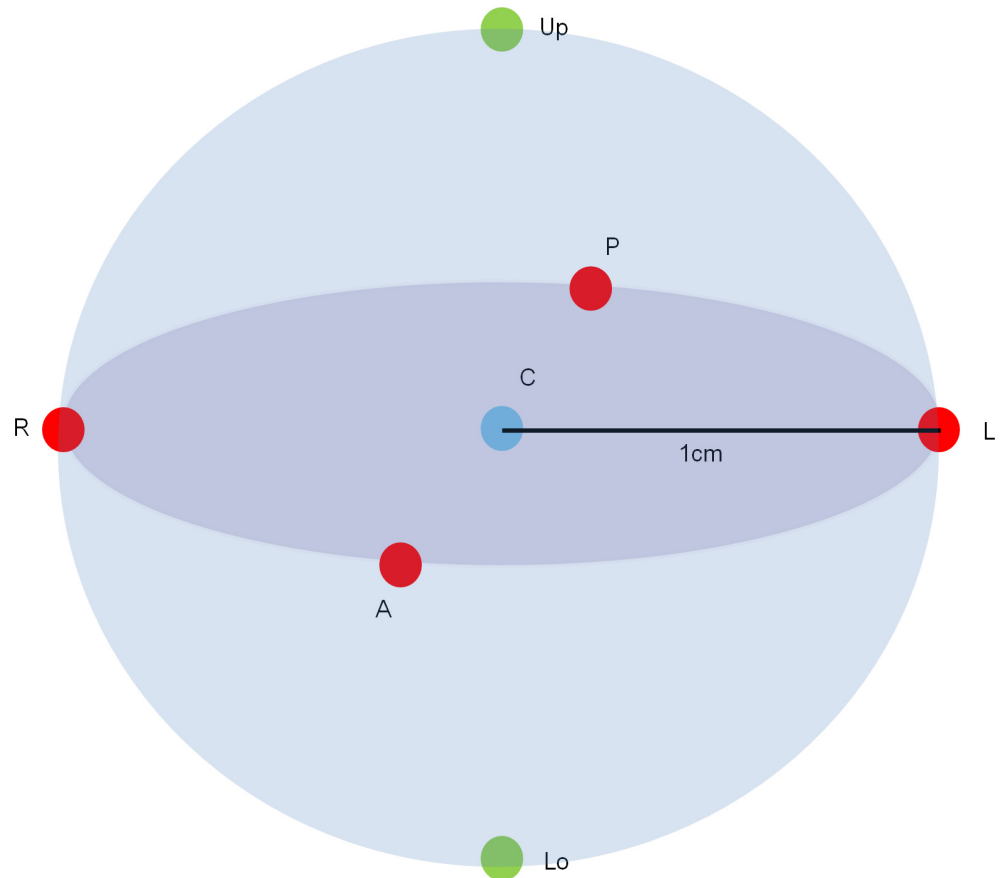

**Fig 2. 3D locations of the phantom.** C represent the center of the FOV; A, P, R, L, Up, and Lo represent anterior, posterior, right, left, upper, and lower positions, respectively, 1 cm offset from the FOV center.

doi:10.1371/journal.pone.0153884.g002

components were removed from the Alphard in order to maintain similar examination conditions. One of the protocols with the smallest FOV of the Alphard was excluded because the images of the test object were partially obtained in the peripheral positions and some indexes could not be obtained.

All CBCT images were stored using the DICOM 3.0 (512 X 512 pixel) into a Windows 7-based workstation (Intel Core i5 3570, 4 GByte, calibrated 21.3 inch color monitor, resolution 1563 X 2048 pixels, NVIDIA Quadro 2000 graphics card) and transferred to the QUART DVT\_TEC (QUART GmbH, Zorneding, Germany) software for semi-automatic image quality evaluation (Fig 3). Image quality assessments were measured twice by one experienced radiologist for intra-observer reliability.

### Image quality assessment items

Four image quality indexes were analyzed using the Quart DVT\_AP phantom and QUART DVT\_TEC software as follows. All tolerance levels are from the phantom manual (Table 2):

The voxel size (nominal resolution) is the unit pixel dimension (mm) obtained from the Nyquist frequency (NF). The NF is defined as the nominal resolution capability of an x-ray system. The NF is a value independent from dose intensity and object location. The voxel size within 5% of the manufacturer's specifications is defined as the recommended tolerance.

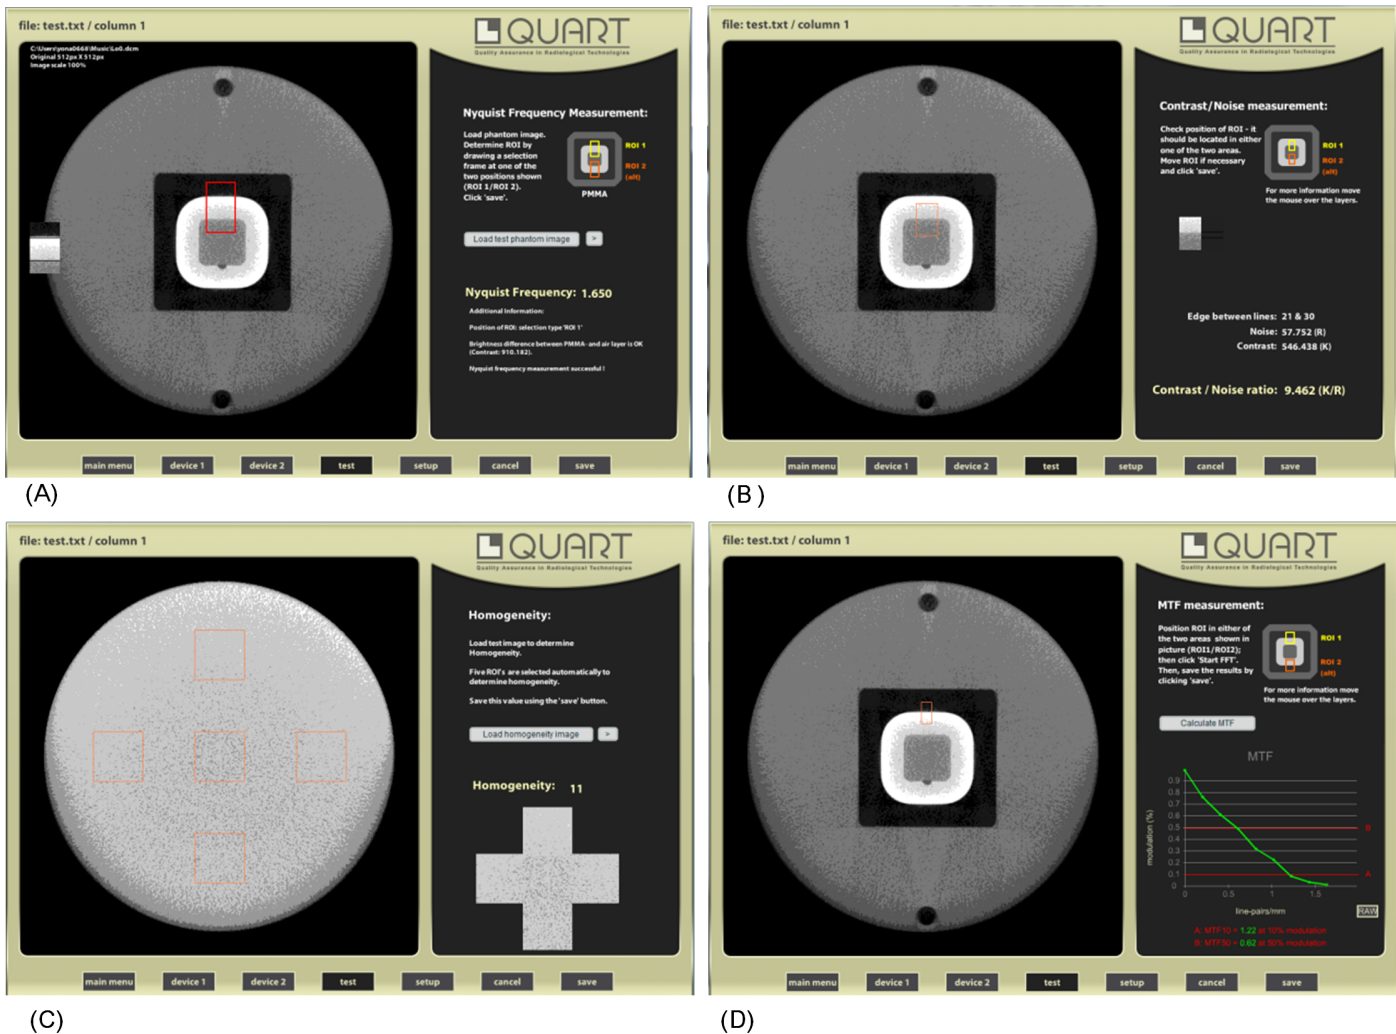

**Fig 3. QUART DVT\_TEC software for image quality assessment.** (A) Nyquist Frequency. (NF) (B) Contrast to Noise Ratio (CNR). (C) Homogeneity. (D) Modulation Transfer Function (MTF). “Screenshots from QUART DVT\_TEC software under a CC BY license, with permission from QUART GmbH, original copyright 2014.”

doi:10.1371/journal.pone.0153884.g003

The CNR is defined as a ratio of contrast between the PVC-PMMA and the mean image noise of the PVC-PMMA. It describes to what extent a visual contrast can be discerned from the statistical background variations. A CNR within 20% of the manufacturer's specifications is defined as the recommended tolerance range. Because there were no CNR specifications

**Table 2. Definition and tolerance of four image quality indexes.** All tolerance levels are from the phantom manual.

| Image quality indexes                                  | Definition                                                                                                | Tolerance                               |
|--------------------------------------------------------|-----------------------------------------------------------------------------------------------------------|-----------------------------------------|
| Voxel size (Nominal resolution)                        | unit pixel dimension (mm)                                                                                 | 5% of the manufacturer's specification  |
| Contrast to noise ratio (CNR)                          | a ratio of contrast between the PVC-PMMA and the mean image noise of the PVC-PMMA                         | 20% of the manufacturer's specification |
| Homogeneity                                            | relationship between the measured basic contrast and measured background change within a homogenous slice | > 5.0                                   |
| 10% point of the modulation transfer function (MTF10%) | the spatial frequency where the modulation is 10%                                                         | ≥ 1.0                                   |

doi:10.1371/journal.pone.0153884.t002

provided by both manufacturers, the acceptability of the CNR could not be evaluated directly in this study. Instead, the CNR of the center and periphery was compared.

Homogeneity is defined as the relationship between the measured basic contrast and measured background change within a homogenous slice. The homogeneity is measured in a slice image of disc2. A homogeneity value over 5.0 is defined as the recommended tolerance.

The MTF (modulation transfer function) is defined as a measure of how the x-ray system reproduces details of an object in the image. Spatial resolution is usually represented by an MTF10%, which is the spatial frequency where the modulation is 10%. The value is given in line pairs per millimeter (Lp/mm). An MTF10% above 1.0 is defined as the tolerance level.

## Statistical analysis

Because the manual selection of the ROI was preceded in the process of image quality assessment by use of the QUART DVT\_TEC software, the intra-class correlation coefficient (ICC) was calculated for evaluating the reliability of manual processing. Image quality indexes of six peripheral locations were statistically compared with those of the center position using the Wilcoxon signed-rank test ( $p < 0.05$ ). Statistical analysis was carried out with the SPSS 20.0 (SPSS Inc., Chicago). A tolerance of all indexes was assessed, too.

## Results

The ICC of the image quality indexes were all above 0.96. Image quality indexes among the five repeated images taken from the same location showed different means and standard deviations. These values were varied according to the exposure protocols and the phantom's location (Table 3). Four image quality indexes showed statistically significant differences at some of the peripheral locations. Moreover, those locations were different for each image quality index (Table 4, Fig 4).

### Voxel size (nominal resolution)

Voxel sizes of all of the exposure protocols were within tolerance, which was 5% of the manufacturer's specification (Table 3). The voxel size of the Alphard showed statistically significant differences at some of the peripheral locations. The voxel size of the Symphony did not show any statistically significant difference (Table 4, Fig 4(A)).

### CNR

The CNR of both CBCTs showed statistically significant differences at some of the peripheral locations. These locations were the lower and posterior positions of the Alphard implant (I) mode, the anterior position of the Alphard cephalo (C) mode and the upper and posterior positions of the Symphony (Table 4, Fig 4(B)). Among these, there were positions which showed mean differences over 20% with the center, which was 24.09% in the lower position of the Alphard I mode, 20.37% in the anterior position of the Alphard C mode and -31.27% in the upper position of the Symphony (Tables 4 and 5).

### Homogeneity

Homogeneity of the center was within tolerance in all exposure protocols (Table 3, Fig 4(C)). Meanwhile, homogeneity of both CBCTs showed statistically significant differences at some peripheral locations. Especially, the anterior and posterior locations of all exposure protocols showed statistically significant differences compared to the center. There were other locations that showed statistically significant differences, which were the right and left positions of the

**Table 3. Means and standard deviations (SD) of four indexes.** SD is the standard deviation. CNR = Contrast to Noise Ratio. MTF10% = the 10% point of the modulation transfer function. Upper, Lower, Center, Anterior, Posterior, Right, and Left represent upper, lower, center, anterior, posterior, right, and left positions 1 cm offset from the center of the FOV. Measurements below the tolerance are shown in bold. The CNR, which showed over 20% difference with the center, is also marked in bold.

| Machine      | Mode         | Index       | Mean ± SD          | Mean ± SD          |                    |                   |                    |                    |                   |                   |
|--------------|--------------|-------------|--------------------|--------------------|--------------------|-------------------|--------------------|--------------------|-------------------|-------------------|
|              |              |             |                    | Upper              | Lower              | Center            | Anterior           | Posterior          | Right             | Left              |
| Alphard 3030 | Implant (I)  | Voxel size  | 0.20 ±0.00         | 0.20 ±0.00         | 0.20 ±0.00         | 0.20 ±0.00        | 0.20 ±0.00         | 0.20 ±0.00         | 0.20 ±0.00        | 0.20 ±0.00        |
|              |              | CNR         | 6.71 ±0.65         | 6.60 ±0.50         | <b>7.83</b> ±0.87  | 6.31 ±0.53        | 7.06 ±0.73         | 5.76 ±0.48         | 6.44 ±0.58        | 6.94 ±0.96        |
|              |              | Homogeneity | 6.81 ±1.28         | 6.40 ±0.55         | 6.60 ±0.55         | 6.60 ±0.55        | <b>5.00</b> ±0.00  | 9.30 ±0.45         | 7.00 ±0.00        | 6.80 ±0.45        |
|              |              | MTF10%      | 1.56 ±0.11         | 1.60 ±0.04         | 1.51 ±0.06         | 1.60 ±0.06        | 1.77 ±0.16         | 1.47 ±0.07         | 1.52 ±0.03        | 1.43 ±0.07        |
|              | Panorama (P) | Voxel size  | 0.30 ±0.00         | 0.31 ±0.00         | 0.30 ±0.00         | 0.30 ±0.00        | 0.30 ±0.00         | 0.30 ±0.00         | 0.31 ±0.00        | 0.30 ±0.00        |
|              |              | CNR         | 11.74 ±1.79        | 10.46 ±0.98        | <b>13.99</b> ±1.17 | 11.34 ±1.64       | 11.00 ±0.49        | 10.58 ±1.59        | 11.50 ±1.97       | 13.30 ±1.24       |
|              |              | Homogeneity | 10.96 ±1.72        | 10.60 ±0.55        | 11.40 ±0.55        | 11.00 ±0.00       | 13.10 ±0.22        | 7.40 ±0.55         | 11.80 ±0.84       | 11.40 ±0.55       |
|              |              | MTF10%      | 1.30 ±0.08         | 1.34 ±0.06         | 1.36 ±0.02         | 1.30 ±0.06        | 1.28 ±0.04         | 1.38 ±0.05         | 1.18 ±0.02        | 1.23 ±0.02        |
|              | Cephalo (C)  | Voxel size  | 0.39 ±0.01         | 0.40 ±0.00         | 0.39 ±0.01         | 0.40 ±0.00        | 0.40 ±0.00         | 0.39 ±0.01         | 0.39 ±0.01        | 0.39 ±0.01        |
|              |              | CNR         | 16.11 ±2.00        | 14.72 ±1.88        | 17.42 ±2.03        | 15.02 ±1.29       | <b>18.08</b> ±2.00 | 14.74 ±1.06        | 15.87 ±1.83       | 16.90 ±1.44       |
|              |              | Homogeneity | 8.21 ±1.17         | 7.00 ±0.00         | 7.00 ±0.00         | 7.20 ±0.45        | 8.00 ±0.00         | 9.10 ±0.22         | 9.20 ±0.45        | 10.00 ±0.00       |
|              |              | MTF10%      | 0.91 ±0.07         | <b>0.84</b> ±0.01  | <b>0.91</b> ±0.04  | <b>0.88</b> ±0.01 | <b>0.88</b> ±0.05  | <b>0.86</b> ±0.02  | 1.00 ±0.03        | <b>0.99</b> ±0.04 |
| Ray Symphony | Voxel size   | 0.39 ±0.00  | 0.38 ±0.00         | 0.38 ±0.00         | 0.38 ±0.00         | 0.38 ±0.00        | 0.38 ±0.00         | 0.38 ±0.00         | 0.39 ±0.01        |                   |
|              | CNR          | 15.37 ±3.12 | <b>12.35</b> ±2.05 | <b>13.71</b> ±4.01 | 17.97 ±1.80        | 17.77 ±2.43       | 16.52 ±3.09        | <b>13.64</b> ±2.02 | 15.62 ±1.87       |                   |
|              | Homogeneity  | 11.13 ±7.17 | 14.60 ±0.55        | 22.20 ±0.84        | 19.50 ±2.24        | <b>4.00</b> ±0.00 | 7.80 ±0.45         | <b>4.80</b> ±0.45  | <b>5.00</b> ±0.00 |                   |
|              | MTF10%       | 0.67 ±0.03  | <b>0.71</b> ±0.04  | <b>0.64</b> ±0.02  | <b>0.66</b> ±0.02  | <b>0.65</b> ±0.01 | <b>0.67</b> ±0.02  | <b>0.71</b> ±0.02  | <b>0.69</b> ±0.02 |                   |

doi:10.1371/journal.pone.0153884.t003

**Table 4. Statistical analysis of image quality index values.** <sup>a</sup> represents p<0.05. CNR = Contrast to Noise Ratio. MTF10% = the 10% point of the modulation transfer function. Upper, Lower, Center, Anterior, Posterior, Right, and Left represent upper, lower, center, anterior, posterior, right, and left positions 1 cm offset from the center of the FOV. Measurements below the tolerance are shown in bold. The CNR, which showed over 20% difference with the center, is also marked in bold.

| Machine      | Mode         | Index                   | P value                 |                         |                         |                         |                         |                         |
|--------------|--------------|-------------------------|-------------------------|-------------------------|-------------------------|-------------------------|-------------------------|-------------------------|
|              |              |                         | Upper                   | Lower                   | Anterior                | Posterior               | Right                   | Left                    |
| Alphard 3030 | Implant (I)  | Voxel size              | .025 <sup>a</sup>       | .025 <sup>a</sup>       | .157                    | .025 <sup>a</sup>       | .157                    | 1.000                   |
|              |              | CNR                     | .500                    | <b>.043<sup>a</sup></b> | .138                    | .043 <sup>a</sup>       | .893                    | .345                    |
|              |              | Homogeneity             | .564                    | 1.000                   | <b>.038<sup>a</sup></b> | .039 <sup>a</sup>       | .157                    | .564                    |
|              |              | MTF10%                  | .893                    | .138                    | .043 <sup>a</sup>       | .043 <sup>a</sup>       | .043 <sup>a</sup>       | .043 <sup>a</sup>       |
|              | Panorama (P) | Voxel size              | .025 <sup>a</sup>       | 1.000                   | 1.000                   | 1.000                   | .180                    | 1.000                   |
|              |              | CNR                     | .345                    | <b>.080</b>             | .317                    | .345                    | .686                    | .080                    |
|              |              | Homogeneity             | .157                    | .157                    | .034 <sup>a</sup>       | .038 <sup>a</sup>       | .102                    | .180                    |
|              |              | MTF10%                  | .225                    | .138                    | .686                    | .080                    | .043 <sup>a</sup>       | .043 <sup>a</sup>       |
|              | Cephalo (C)  | Voxel size              | 1.000                   | .059                    | 1.000                   | .157                    | .059                    | .046 <sup>a</sup>       |
|              |              | CNR                     | .686                    | .080                    | <b>.043<sup>a</sup></b> | .686                    | .500                    | .138                    |
|              |              | Homogeneity             | .317                    | .317                    | .046 <sup>a</sup>       | .039 <sup>a</sup>       | .025 <sup>a</sup>       | .034 <sup>a</sup>       |
|              |              | MTF10%                  | <b>.043<sup>a</sup></b> | <b>.080</b>             | <b>.893</b>             | <b>.068</b>             | .043 <sup>a</sup>       | <b>.043<sup>a</sup></b> |
| Ray Symphony | Voxel size   | 1.000                   | 1.000                   | 1.000                   | 1.000                   | 1.000                   | .317                    |                         |
|              | CNR          | <b>.043<sup>a</sup></b> | .138                    | .500                    | .500                    | <b>.080</b>             | .080                    |                         |
|              | Homogeneity  | .043 <sup>a</sup>       | .080                    | <b>.043<sup>a</sup></b> | .043 <sup>a</sup>       | <b>.043<sup>a</sup></b> | <b>.043<sup>a</sup></b> |                         |
|              | MTF10%       | <b>.136</b>             | <b>.138</b>             | <b>.686</b>             | <b>.686</b>             | <b>.043<sup>a</sup></b> | <b>.043<sup>a</sup></b> |                         |

doi:10.1371/journal.pone.0153884.t004



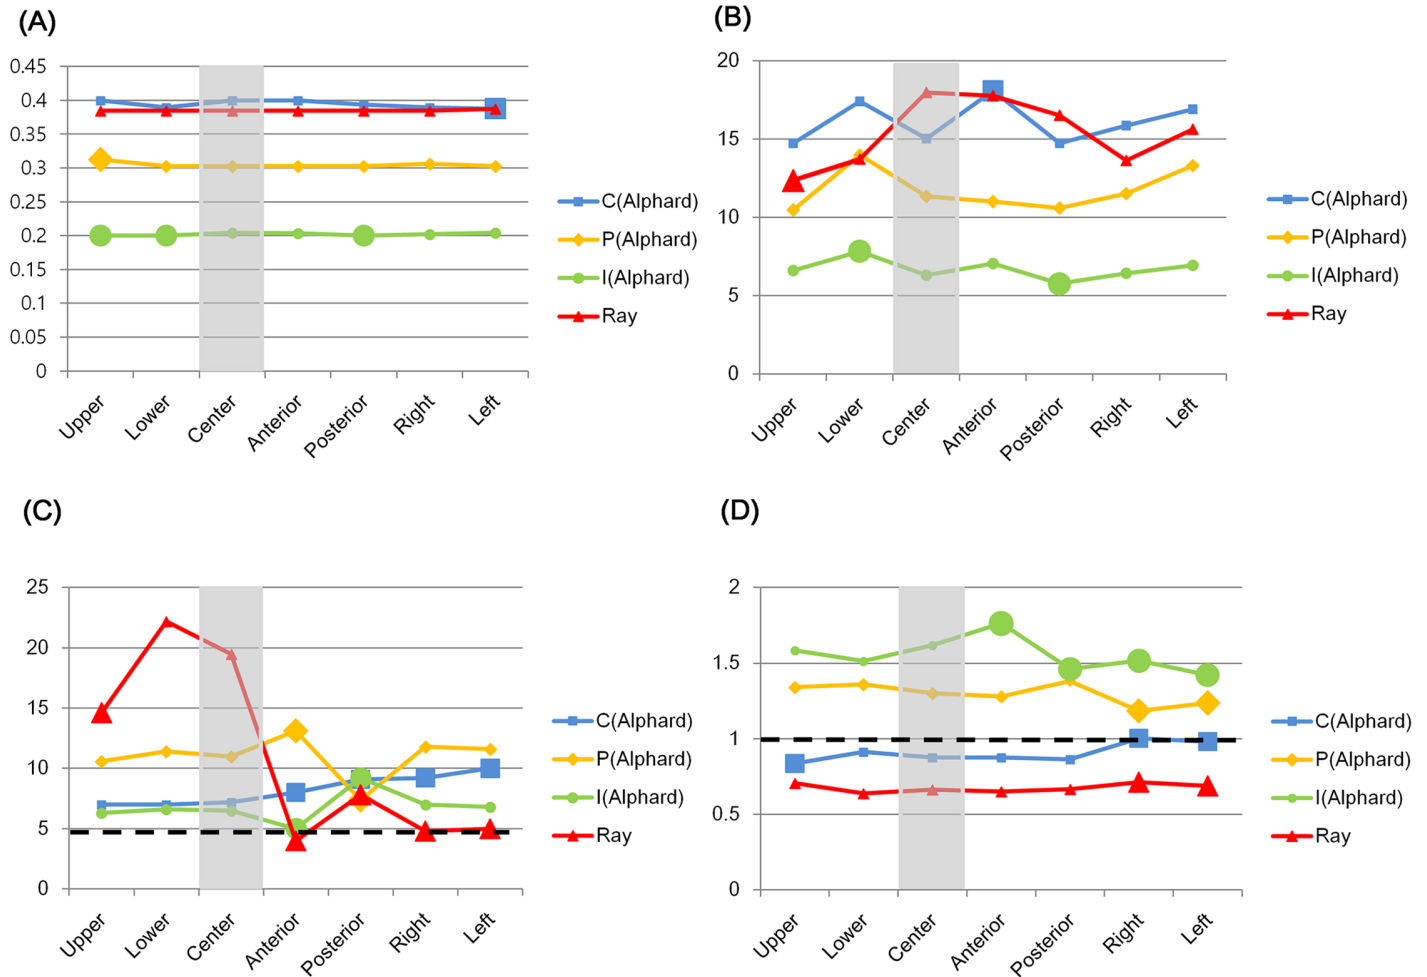

**Fig 4. Statistical analysis of image quality index values.** (A) Voxel size. (B) Contrast to Noise Ratio (CNR). (C) Homogeneity. (D) 10% point of the modulation transfer function (MTF10%). C, P, and I represent cephalo, panorama, and implant modes of the Alphard 3030 CBCT, respectively. Ray is the Ray Symphony CBCT. Gray columns represent the center position, large nodes represent the values with statistically significant difference compared with the center, and black dotted lines represent the tolerance levels.

doi:10.1371/journal.pone.0153884.g004

Alphard C mode and the upper, right, and left positions of the Symphony (Table 4, Fig 4(C)). Among these, the anterior of the Alphard I mode and the anterior, right, and left positions of the Symphony showed values under tolerance (~5%) (Table 3, Fig 4(C)). The biggest mean difference with the center was 40.91% of the Alphard I mode and -79.49% of the Symphony (Table 5).

### MTF10%

The Alphard C mode and Symphony showed the MTF10% under the tolerance in all positions except the right position of the Alphard C mode. Other modes of the Alphard showed the MTF10% within tolerance (Table 3, Fig 4(D)). The MTF10% of both CBCTs showed statistically significant differences at some of the peripheral locations. Especially, the right and left positions of both CBCTs showed statistically significant differences. There were other locations which showed statistically significant differences, which were the anterior and posterior positions of the Alphard I mode and the upper position of the Alphard C mode (Table 4, Fig 4(D)).

**Table 5. The mean difference (%) with the center position.** CNR = Contrast to Noise Ratio. MTF10% = the 10% point of the modulation transfer function. Upper, Lower, Center, Anterior, Posterior, Right, and Left represent upper, lower, center, anterior, posterior, right, and left positions 1 cm offset from the center of the FOV. Measurements below the tolerance are shown in bold. The CNR, which showed over 20% difference with the center, is also marked in bold.

| Machine      | Mode         | Index         | Upper (%)     | Lower (%)     | Anterior (%)  | Posterior (%) | Right (%)     | Left (%)     |
|--------------|--------------|---------------|---------------|---------------|---------------|---------------|---------------|--------------|
| Alphard 3030 | Implant (I)  | Voxel size    | 0.00          | 0.00          | 0.00          | 0.00          | 0.00          | 0.00         |
|              |              | CNR           | 4.60          | <b>24.09</b>  | 11.89         | -8.72         | 2.06          | 9.98         |
|              |              | Homogeneity   | -3.03         | 0.00          | <b>-24.24</b> | 40.91         | 6.06          | 3.03         |
|              |              | MTF10%        | 0.00          | -5.63         | 10.63         | -8.13         | -5.00         | -10.63       |
|              | Panorama (P) | Voxel size    | 3.33          | 0.00          | 0.00          | 0.00          | 3.33          | 0.00         |
|              |              | CNR           | -7.76         | <b>23.37</b>  | -3.00         | -6.70         | 1.41          | 17.28        |
|              |              | Homogeneity   | -3.64         | 3.64          | 19.09         | -32.73        | 7.27          | 3.64         |
|              |              | MTF10%        | 3.08          | 4.62          | -1.54         | 6.15          | -9.23         | -5.38        |
|              | Cephalo (C)  | Voxel size    | 0.00          | -2.50         | 0.00          | -2.50         | -2.50         | -2.50        |
|              |              | CNR           | -2.00         | 15.98         | <b>20.37</b>  | -1.86         | 5.66          | 12.52        |
|              |              | Homogeneity   | -2.78         | -2.78         | <b>11.11</b>  | <b>26.39</b>  | <b>27.78</b>  | <b>38.89</b> |
|              |              | MTF10%        | <b>-4.55</b>  | <b>3.41</b>   | <b>0.00</b>   | <b>-2.27</b>  | 13.64         | <b>12.50</b> |
| Ray Symphony | Voxel size   | 0.00          | 0.00          | 0.00          | 0.00          | 0.00          | 2.63          |              |
|              | CNR          | <b>-31.27</b> | <b>-23.71</b> | -1.11         | -8.07         | <b>-24.10</b> | -13.08        |              |
|              | Homogeneity  | -25.13        | 13.85         | <b>-79.49</b> | -60.00        | <b>-75.38</b> | <b>-74.36</b> |              |
|              | MTF10%       | <b>7.58</b>   | <b>-3.03</b>  | <b>-1.52</b>  | <b>1.52</b>   | <b>7.58</b>   | <b>4.55</b>   |              |

doi:10.1371/journal.pone.0153884.t005

The biggest mean difference with the center was 13.64% of the Alphard I mode and 7.58% of the Symphony (Table 5).

## Discussion

Previous studies reported a gray value (GV) variation according to the location inside the object.[9–11] These studies assumed an ideal condition that the object was positioned at the center of the FOV; yet this is different from clinical situations where patients are not always at the same position. Other studies showed a GV change according to the phantom location.[12–15] However, analyzing a GV difference is one quantitative approach from the perspective of each voxel, and it is difficult to obtain the overall information about the change in image quality, which can be represented by various indexes including the CNR, homogeneity, MTF10% and so on.

The three main physical factors affecting image quality are now generally considered to be the contrast, noise, and sharpness [16], which are represented by the CNR, homogeneity, and MTF, respectively. Each factor is related to unique features of the anatomical structures expressed by various imaging modalities. The CNR is related to the imaging performance with respect to large, low-contrast structures [17,18], whereas the MTF is related to the reproduction of small structures. [17,19] Homogeneity is related to the noise distribution and affects the low-contrast detectability. [18,20]

The three indexes above also describe the physical performance of the imaging system in specific conditions, but it is often difficult to link these to clinical performance.[16] Nonetheless, there have been reports about the correlation between the MTF [21], CNR [21–28], and subjective evaluation in lesion detection. The CNR can be an important factor in the evaluation of the periodontal ligament space and lamina dura [21], which are important for the periapical and malignant lesion detection in dental diagnostic radiology.[29–31] Additionally, there was a report that a higher CNR made a higher correlation between the CBCT and micro-CT in bone quality evaluation for implant installation.[32] Homogeneity is also reported to affect the lesion



detection performance.[28] The MTF is reported to affect the sensitivity for detection of root fractures.[33–35] On the basis of these correlation with subjective and clinical evaluations, the phantom study has been used as a pre-requisite for obtaining quality images in the clinical setting, currently.[36]

In spite of increased attention about a correlation between objective and subjective image quality evaluation, there has been no study yet about the image quality needed for comparing follow up CBCT images. Comparing current images with previous ones is important for lesion detection. However, even experienced radiologists sometimes fail to interpret the images correctly.[37,38] To reduce this failure, physical factors that can affect the comparison performance need to be analyzed beforehand. Following the same line of thought, analyzing the effect of the change in object position should precede the comparison of follow up CBCT images.

In this study, the voxel size showed statistically significant differences at some of the peripheral locations. Because the voxel sizes of all of the exposure protocols were within the tolerance (~5%), these differences were not substantially important. This is because the signals obtained from the CBCT detector are sampled by an NF fixed for the specific exposure protocol. This result showed that the voxel sizes were all acceptable in this experiment, and other image quality indexes were nearly influenced by the voxel size.

The CNR, homogeneity, and MTF10% of both CBCTs showed statistically significant differences at some of the peripheral locations (Table 4, Fig 4). The average differences between the center and these peripheries were up to 31.27% (CNR), 70.49% (homogeneity), and 13.64% (MTF10%) (Table 5). The different tolerance levels for image quality are reportedly needed according to the treatment such as bone quality evaluation for implants and periapical lesion detection.[21] Therefore, in order to compare follow up CBCT images accurately, different tolerance levels of image quality might also be required. Furthermore, considerable image quality differences according to the object's location might affect the complex and time-consuming comparison procedure. Image quality difference also can influence image subtraction [39,40], which has significantly raised the accuracy of the lesion detection.[41–43]

The European Commission in EUR 16262 defined image quality criteria as a level of performance considered necessary to produce images of standard quality for a particular anatomical structure.[44] Therefore, image quality indexes below the tolerance might affect the interpretation of an anatomical structure. In this study, homogeneity was below tolerance at some of the peripheral locations. There have been studies which have reported that there was little correlation between homogeneity and lesion detection.[21,45] However, homogeneity in those studies was all within the tolerance and there was no lesion size classification. Another study reported that the lesion detection performance was influenced by homogeneity when the lesion size was below 1 mm.[46] When comparing follow up CBCT images, radiologists often make efforts to identify the subtle changes of the lesion size or bone pattern around the lesion. Therefore, unacceptable homogeneities might affect the lesion detection performance of follow up CBCT images.

The C mode of the Alphard 3030 and Symphony showed an MTF10% below the tolerance except at one peripheral position (the left position of the Alphard C mode) (Table 3, Fig 4D). Many of the MTF10% of the CBCT with a large voxel size (about 0.4 mm) were below tolerance in some studies.[1,47,48] However, an MTF10% above 1.0 is recommended as a realistic spatial resolution of the CBCT [1] and this is possible in an exposure protocol with a voxel size of about 0.4 mm, as this result showed. Therefore, an acceptable MTF10% of the center has to be guaranteed first before the proper evaluation of the MTF10% at the peripheral positions.

The patient position has been an important issue in diagnostic radiology because the form of the internal organs can be influenced by different patient postures.[49–51] However, the effect of the position itself has not been thoroughly reviewed in previous studies. In this study,

different object positions resulted in significant and considerable changes in the image quality indexes that might affect the comparison of follow up CBCT images. This result is meaningful because any CBCT image may be compared for other purposes such as lesion detection or post-implantation checkups. Therefore, it is important for radiologists and technicians to seek a more reproducible patient positioning protocol.

This study has the limitation of a physical experiment that analyzed image quality indexes using a CBCT phantom. Therefore, an additional study using a jawbone or cadaver should be needed for evaluating the effect of the position change on the subjective evaluation of the follow up CBCT images. Due to use of the QUART DVT\_TEC software, it was impossible to analyze the rotated and tilted images. In a future study, it is necessary to evaluate rotated and tilted images for reproducing clinical situations.

## Conclusions

Because the CNR, homogeneity, and MTF10% were significantly affected by positional changes of the phantom, an object's position can influence the interpretation of follow up CBCT images. Therefore, efforts to locate the object in the same position are important.

## Supporting Information

**S1 Document. Granted permission (the screenshots of the DVTtec).**  
(PDF)

**S1 Table. Experiment data (C mode of the Alphard 3030).**  
(XLSX)

**S2 Table. Experiment data (P mode of the Alphard 3030).**  
(XLSX)

**S3 Table. Experiment data (I mode of the Alphard 3030).**  
(XLSX)

**S4 Table. Experiment data (Ray Symphony).**  
(XLSX)

## Acknowledgments

The author thanks the company QUART GmbH for permission to reproduce the screenshots of the first version of the software DVTtec. More information on this software can be found in [www.quart.de](http://www.quart.de). QUART has no responsibility for the placement and context in which the images are reproduced by the author, nor is QUART in any way responsible for the other content or accuracy therein.

## Author Contributions

Conceived and designed the experiments: SSH JJH. Performed the experiments: JJH. Analyzed the data: SSH HP HGJ JJH. Contributed reagents/materials/analysis tools: HP HGJ. Wrote the paper: SSH JJH.

## References

1. Brullmann D, Schulze RK. Spatial resolution in CBCT machines for dental/maxillofacial applications—what do we know today? *Dentomaxillofac Radiol.* 2015; 44: 20140204. doi: [10.1259/dmfr.20140204](https://doi.org/10.1259/dmfr.20140204) PMID: [25168812](https://pubmed.ncbi.nlm.nih.gov/25168812/)

2. Hofmann E, Schmid M, Sedlmair M, Banckwitz R, Hirschfelder U, Lell M. Comparative study of image quality and radiation dose of cone beam and low-dose multislice computed tomography—an in-vitro investigation. *Clin Oral Investig*. 2014; 18: 301–311. doi: [10.1007/s00784-013-0948-9](https://doi.org/10.1007/s00784-013-0948-9) PMID: [23460022](https://pubmed.ncbi.nlm.nih.gov/23460022/)
3. Radiation Protection: Cone Beam CT for Dental and Maxillofacial Radiology. Evidence Based Guidelines. 2011.
4. Sicherung der Bildqualität in röntgendiagnostischen Betrieben—Teil 161: Abnahmeprüfung nach R6V an zahnmedizinischen Röntgeneinrichtungen zur digitalen Volumentomographie, DIN Report Nr 6868–161 (DIN, Berlin, 2013).
5. Hofmann E, Schmid M, Lell M, Hirschfelder U. Cone beam computed tomography and low-dose multislice computed tomography in orthodontics and dentistry: a comparative evaluation on image quality and radiation exposure. *J Orofac Orthop*. 2014; 75: 384–398. doi: [10.1007/s00056-014-0232-x](https://doi.org/10.1007/s00056-014-0232-x) PMID: [25158951](https://pubmed.ncbi.nlm.nih.gov/25158951/)
6. Pauwels R, Beinsberger J, Stamatakis H, Tsiklakis K, Walker A, Bosmans H, et al. Comparison of spatial and contrast resolution for cone-beam computed tomography scanners. *Oral Surg Oral Med Oral Pathol Oral Radiol*. 2012; 114: 127–135. PMID: [22727102](https://pubmed.ncbi.nlm.nih.gov/22727102/)
7. Suomalainen A, Kiljunen T, Kaser Y, Peltola J, Kortensniemi M. Dosimetry and image quality of four dental cone beam computed tomography scanners compared with multislice computed tomography scanners. *Dentomaxillofac Radiol*. 2009; 38: 367–378. doi: [10.1259/dmfr/15779208](https://doi.org/10.1259/dmfr/15779208) PMID: [19700530](https://pubmed.ncbi.nlm.nih.gov/19700530/)
8. Bamba J, Araki K, Endo A, Okano T. Image quality assessment of three cone beam CT machines using the SEDENTEXCT CT phantom. *Dentomaxillofac Radiol*. 2013; 42: 20120445. doi: [10.1259/dmfr.20120445](https://doi.org/10.1259/dmfr.20120445) PMID: [23956235](https://pubmed.ncbi.nlm.nih.gov/23956235/)
9. Pauwels R, Stamatakis H, Manousaridis G, Walker A, Michielsen K, Bosmans H, et al. Development and applicability of a quality control phantom for dental cone-beam CT. *J Appl Clin Med Phys*. 2011; 12: 3478. doi: [10.1120/jacmp.v12i4.3478](https://doi.org/10.1120/jacmp.v12i4.3478) PMID: [22089004](https://pubmed.ncbi.nlm.nih.gov/22089004/)
10. Molteni R. Prospects and challenges of rendering tissue density in Hounsfield units for cone beam computed tomography. *Oral Surg Oral Med Oral Pathol Oral Radiol*. 2013; 116: 105–119. doi: [10.1016/j.oooo.2013.04.013](https://doi.org/10.1016/j.oooo.2013.04.013) PMID: [23768878](https://pubmed.ncbi.nlm.nih.gov/23768878/)
11. Katsumata A, Hirukawa A, Okumura S, Naitoh M, Fujishita M, Ariji E, et al. Relationship between density variability and imaging volume size in cone-beam computerized tomographic scanning of the maxillofacial region: an in vitro study. *Oral Surg Oral Med Oral Pathol Oral Radiol Endod*. 2009; 107: 420–425. doi: [10.1016/j.tripleo.2008.05.049](https://doi.org/10.1016/j.tripleo.2008.05.049) PMID: [18715805](https://pubmed.ncbi.nlm.nih.gov/18715805/)
12. Lagravère MO, Carey J, Ben-Zvi M, Packota GV, Major PW. Effect of object location on the density measurement and Hounsfield conversion in a NewTom 3G cone beam computed tomography unit. *Dentomaxillofac Radiol*. 2008; 37: 305–308. doi: [10.1259/dmfr/65993482](https://doi.org/10.1259/dmfr/65993482) PMID: [18757714](https://pubmed.ncbi.nlm.nih.gov/18757714/)
13. Nackaerts O, Maes F, Yan H, Couto Souza P, Pauwels R, Jacobs R. Analysis of intensity variability in multislice and cone beam computed tomography. *Clin Oral Implants Res*. 2011; 22: 873–879. doi: [10.1111/j.1600-0501.2010.02076.x](https://doi.org/10.1111/j.1600-0501.2010.02076.x) PMID: [21244502](https://pubmed.ncbi.nlm.nih.gov/21244502/)
14. Eskandarloo A, Abdinian M, Salemi F, Hashemzadeh Z, Safaei M. Effect of object location on the density measurement in cone-beam computed tomography versus multislice computed tomography. *Dent Res J (Isfahan)*. 2012; 9: S81–87.
15. Plachtovics M, Bujtar P, Mommaerts M, Nagy K. High-quality image acquisition by double exposure overlap in dental cone beam computed tomography. *Oral Surg Oral Med Oral Pathol Oral Radiol*. 2014; 117: 760–767. doi: [10.1016/j.oooo.2014.02.024](https://doi.org/10.1016/j.oooo.2014.02.024) PMID: [24736110](https://pubmed.ncbi.nlm.nih.gov/24736110/)
16. Martin CJ, Sharp PF, Sutton DG. Measurement of image quality in diagnostic radiology. *Appl Radiat Isot*. 1999; 50: 21–38. PMID: [10028626](https://pubmed.ncbi.nlm.nih.gov/10028626/)
17. Pauwels R, Araki K, Siewerdsen JH, Thongvigitmanee SS. Technical aspects of dental CBCT: state of the art. *Dentomaxillofac Radiol*. 2015; 44: 20140224. doi: [10.1259/dmfr.20140224](https://doi.org/10.1259/dmfr.20140224) PMID: [25263643](https://pubmed.ncbi.nlm.nih.gov/25263643/)
18. Tanaka C, Ueguchi T, Shimosegawa E, Sasaki N, Johkoh T, Nakamura H, et al. Effect of CT acquisition parameters in the detection of subtle hypoattenuation in acute cerebral infarction: a phantom study. *AJNR Am J Neuroradiol*. 2006; 27: 40–45. PMID: [16418353](https://pubmed.ncbi.nlm.nih.gov/16418353/)
19. Sherwood IA. Pre-operative diagnostic radiograph interpretation by general dental practitioners for root canal treatment. *Dentomaxillofac Radiol*. 2012; 41: 43–54. doi: [10.1259/dmfr/26466415](https://doi.org/10.1259/dmfr/26466415) PMID: [22074878](https://pubmed.ncbi.nlm.nih.gov/22074878/)
20. Endo M, Tsunoo T, Nakamori N, Yoshida K. Effect of scattered radiation on image noise in cone beam CT. *Med Phys*. 2001; 28: 469–474. PMID: [11339743](https://pubmed.ncbi.nlm.nih.gov/11339743/)
21. Choi JW, Lee SS, Choi SC, Heo MS, Huh KH, Yi WJ, et al. Relationship between physical factors and subjective image quality of cone-beam computed tomography images according to diagnostic task. *Oral Surg Oral Med Oral Pathol Oral Radiol*. 2015; 119: 357–365. doi: [10.1016/j.oooo.2014.11.010](https://doi.org/10.1016/j.oooo.2014.11.010) PMID: [25592866](https://pubmed.ncbi.nlm.nih.gov/25592866/)

22. Scholtz JE, Kaup M, Kraft J, Noske EM, Scheerer F, Schulz B, et al. Objective and subjective image quality of primary and recurrent squamous cell carcinoma on head and neck low-tube-voltage 80-kVp computed tomography. *Neuroradiology*. 2015; 57: 645–651. doi: [10.1007/s00234-015-1512-x](https://doi.org/10.1007/s00234-015-1512-x) PMID: [25808122](https://pubmed.ncbi.nlm.nih.gov/25808122/)
23. Masafumi Kanoto K K, Takaaki Hosoya, Toshitada Hiraka, Yuuki Toyoguchi, Megumi Kuchiki, Yukio Sugai, Makoto Obara. Detectability of Intraaxial Lesions and Disseminations for Primary Malignant Brain Tumors using Three-Dimensional Contrast-Enhanced Multisection Motion Sensitized Driven Equilibrium. *Journal of Neurology and Neuroscience*. 2015.
24. Guziński M, Waszczuk Ł, Szaśiadek MJ. Head CT: Image quality improvement of posterior fossa and radiation dose reduction with ASiR—comparative studies of CT head examinations. *European Radiology*. 2016. doi: [10.1007/s00330-015-4183-4](https://doi.org/10.1007/s00330-015-4183-4): 1–6.
25. Moore CS, Wood TJ, Beavis AW, Saunderson JR. Correlation of the clinical and physical image quality in chest radiography for average adults with a computed radiography imaging system. *Br J Radiol*. 2013; 86: 20130077. doi: [10.1259/bjr.20130077](https://doi.org/10.1259/bjr.20130077) PMID: [23568362](https://pubmed.ncbi.nlm.nih.gov/23568362/)
26. Moore CS, Wood TJ, Saunderson JR, Beavis AW. Correlation between the signal-to-noise ratio improvement factor (KSNR) and clinical image quality for chest imaging with a computed radiography system. *Phys Med Biol*. 2015; 60: 9047–9058. doi: [10.1088/0031-9155/60/23/9047](https://doi.org/10.1088/0031-9155/60/23/9047) PMID: [26540441](https://pubmed.ncbi.nlm.nih.gov/26540441/)
27. Hirokawa Y, Isoda H, Maetani YS, Arizono S, Shimada K, Okada T, et al. Hepatic lesions: improved image quality and detection with the periodically rotated overlapping parallel lines with enhanced reconstruction technique—evaluation of SPIO-enhanced T2-weighted MR images. *Radiology*. 2009; 251: 388–397. doi: [10.1148/radiol.2512081360](https://doi.org/10.1148/radiol.2512081360) PMID: [19401572](https://pubmed.ncbi.nlm.nih.gov/19401572/)
28. Farquhar TH, Llacer J, Sayre J, Tai YC, Hoffman EJ. ROC and LROC analyses of the effects of lesion contrast, size, and signal-to-noise ratio on detectability in PET images. *J Nucl Med*. 2000; 41: 745–754. PMID: [10768578](https://pubmed.ncbi.nlm.nih.gov/10768578/)
29. Sunitha VR, Emmadi P, Namasivayam A, Thyegarajan R, Rajaraman V. The periodontal—endodontic continuum: A review. *J Conserv Dent*. 2008; 11: 54–62. doi: [10.4103/0972-0707.44046](https://doi.org/10.4103/0972-0707.44046) PMID: [20142886](https://pubmed.ncbi.nlm.nih.gov/20142886/)
30. Dunfee BL, Sakai O, Pistey R, Gohel A. Radiologic and pathologic characteristics of benign and malignant lesions of the mandible. *Radiographics*. 2006; 26: 1751–1768. PMID: [17102048](https://pubmed.ncbi.nlm.nih.gov/17102048/)
31. White SC, P MJ. *Oral radiology: principles and interpretation*, ed 6, St Louise: Mosby. 2009.
32. Klintstrom E, Smedby O, Klintstrom B, Brismar TB, Moreno R. Trabecular bone histomorphometric measurements and contrast-to-noise ratio in CBCT. *Dentomaxillofac Radiol*. 2014; 43: 20140196. doi: [10.1259/dmfr.20140196](https://doi.org/10.1259/dmfr.20140196) PMID: [25168811](https://pubmed.ncbi.nlm.nih.gov/25168811/)
33. Neves FS, Freitas DQ, Campos PS, Ekestubbe A, Lofthag-Hansen S. Evaluation of cone-beam computed tomography in the diagnosis of vertical root fractures: the influence of imaging modes and root canal materials. *J Endod*. 2014; 40: 1530–1536. doi: [10.1016/j.joen.2014.06.012](https://doi.org/10.1016/j.joen.2014.06.012) PMID: [25127934](https://pubmed.ncbi.nlm.nih.gov/25127934/)
34. Costa FF, Gaia BF, Umetsubo OS, Pinheiro LR, Tortamano IP, Cavalcanti MG. Use of large-volume cone-beam computed tomography in identification and localization of horizontal root fracture in the presence and absence of intracanal metallic post. *J Endod*. 2012; 38: 856–859. doi: [10.1016/j.joen.2012.03.011](https://doi.org/10.1016/j.joen.2012.03.011) PMID: [22595127](https://pubmed.ncbi.nlm.nih.gov/22595127/)
35. Wang P, Yan XB, Lui DG, Zhang WL, Zhang Y, Ma XC. Detection of dental root fractures by using cone-beam computed tomography. *Dentomaxillofac Radiol*. 2011; 40: 290–298. doi: [10.1259/dmfr/84907460](https://doi.org/10.1259/dmfr/84907460) PMID: [21697154](https://pubmed.ncbi.nlm.nih.gov/21697154/)
36. Zarb F, Rainford L, McEntee MF. Image quality assessment tools for optimization of CT images. *Radiography*. 2010; 16: 147–153.
37. Varela C, Karssemeijer N, Hendriks JH, Holland R. Use of prior mammograms in the classification of benign and malignant masses. *Eur J Radiol*. 2005; 56: 248–255. PMID: [15890483](https://pubmed.ncbi.nlm.nih.gov/15890483/)
38. Hakim CM, Catullo VJ, Chough DM, Ganott MA, Kelly AE, Shinde DD, et al. Effect of the Availability of Prior Full-Field Digital Mammography and Digital Breast Tomosynthesis Images on the Interpretation of Mammograms. *Radiology*. 2015; 276: 65–72. doi: [10.1148/radiol.15142009](https://doi.org/10.1148/radiol.15142009) PMID: [25768673](https://pubmed.ncbi.nlm.nih.gov/25768673/)
39. Gkanatsios NA, Huda W, Peters KR. Effect of radiographic techniques (kVp and mAs) on image quality and patient doses in digital subtraction angiography. *Med Phys*. 2002; 29: 1643–1650. PMID: [12201409](https://pubmed.ncbi.nlm.nih.gov/12201409/)
40. Veldkamp WJ, Kroft LJ, Geleijns J. Dose and perceived image quality in chest radiography. *Eur J Radiol*. 2009; 72: 209–217. doi: [10.1016/j.ejrad.2009.05.039](https://doi.org/10.1016/j.ejrad.2009.05.039) PMID: [19577393](https://pubmed.ncbi.nlm.nih.gov/19577393/)
41. Nguyen-Huynh MN, Wintermark M, English J, Lam J, Vittinghoff E, Smith WS, et al. How accurate is CT angiography in evaluating intracranial atherosclerotic disease? *Stroke*. 2008; 39: 1184–1188. doi: [10.1161/STROKEAHA.107.502906](https://doi.org/10.1161/STROKEAHA.107.502906) PMID: [18292376](https://pubmed.ncbi.nlm.nih.gov/18292376/)

42. Gu K, Kwon JW, Kim ES. Digital Subtraction Cystography for Detection of Communicating Holes of Spinal Extradural Arachnoid Cysts. *Korean J Radiol.* 2016; 17: 111–116. doi: [10.3348/kjr.2016.17.1.111](https://doi.org/10.3348/kjr.2016.17.1.111) PMID: [26798223](https://pubmed.ncbi.nlm.nih.gov/26798223/)
43. van Asch CJ, Velthuis BK, Rinkel GJ, Algra A, de Kort GA, Witkamp TD, et al. Diagnostic yield and accuracy of CT angiography, MR angiography, and digital subtraction angiography for detection of macrovascular causes of intracerebral haemorrhage: prospective, multicentre cohort study. *Bmj.* 2015; 351: h5762. doi: [10.1136/bmj.h5762](https://doi.org/10.1136/bmj.h5762) PMID: [26553142](https://pubmed.ncbi.nlm.nih.gov/26553142/)
44. Commission E. European guidelines on quality criteria for computed tomography. 1999.
45. Park HJ, Jung SE, Lee YJ, Cho WI, Do KH, Kim SH, et al. The relationship between subjective and objective parameters in CT phantom image evaluation. *Korean J Radiol.* 2009; 10: 490–495. doi: [10.3348/kjr.2009.10.5.490](https://doi.org/10.3348/kjr.2009.10.5.490) PMID: [19721834](https://pubmed.ncbi.nlm.nih.gov/19721834/)
46. Huda W, Ogden KM, Scalzetti EM, Dance DR, Bertrand EA. How do lesion size and random noise affect detection performance in digital mammography? *Acad Radiol.* 2006; 13: 1355–1366. PMID: [17070453](https://pubmed.ncbi.nlm.nih.gov/17070453/)
47. Blendl C, Fiebich M, Voigt JM, Selbach M, Uphoff C. [Investigation on the 3 D geometric accuracy and on the image quality (MTF, SNR and NPS) of volume tomography units (CT, CBCT and DVT)]. *Rofo.* 2012; 184: 24–31. doi: [10.1055/s-0031-1281818](https://doi.org/10.1055/s-0031-1281818) PMID: [22076796](https://pubmed.ncbi.nlm.nih.gov/22076796/)
48. Garayoa J, Castro P. A study on image quality provided by a kilovoltage cone-beam computed tomography. *J Appl Clin Med Phys.* 2013; 14: 3888. doi: [10.1120/jacmp.v14i1.3888](https://doi.org/10.1120/jacmp.v14i1.3888) PMID: [23318380](https://pubmed.ncbi.nlm.nih.gov/23318380/)
49. Cronin CG, Lohan DG, Mhuircheartaigh JN, McKenna D, Alhajeri N, Roche C, et al. MRI small-bowel follow-through: prone versus supine patient positioning for best small-bowel distention and lesion detection. *AJR Am J Roentgenol.* 2008; 191: 502–506. doi: [10.2214/AJR.07.2338](https://doi.org/10.2214/AJR.07.2338) PMID: [18647923](https://pubmed.ncbi.nlm.nih.gov/18647923/)
50. Yeh ED, Georgian-Smith D, Raza S, Bussolari L, Pawlisch-Hoff J, Birdwell RL. Positioning in breast MR imaging to optimize image quality. *Radiographics.* 2014; 34: E1–17. doi: [10.1148/rg.341125193](https://doi.org/10.1148/rg.341125193) PMID: [24428300](https://pubmed.ncbi.nlm.nih.gov/24428300/)
51. Iacobellis F, Brillantino A, Renzi A, Monaco L, Serra N, Feragalli B, et al. MR Imaging in Diagnosis of Pelvic Floor Descent: Supine versus Sitting Position. *Gastroenterol Res Pract.* 2016; 2016: 12.
